# Supplementary material
Source: publisher site journal article supplement (https://www.spandidos-publications.com/1314/downloadSupplementary)
Supplement: Supplementary file 1 [file downloadSupplementary]

Table SI. Different forms of congenital hypothyroidism and associated causative genes selected in the present study.

| Thyroid alteration                | Gene symbol                         | Full name                                             | RefSeq (genome) accession number | RefSeq (mRNA) accession number | CDS length | Number of exons | Protein function                                                                                                                   |
|-----------------------------------|-------------------------------------|-------------------------------------------------------|----------------------------------|--------------------------------|------------|-----------------|------------------------------------------------------------------------------------------------------------------------------------|
| Primary congenital hypothyroidism | <i>PAX8</i>                         | Paired box gene eight                                 | NG_012384.1                      | NM_003466                      | 1353       | 12              | A thyroid enriched transcription factor, involved in thyroid follicular cell development and expression of thyroid-specific genes. |
|                                   | <i>FOXE1 (TTF-2)</i>                | Thyroid transcription factor 2                        | NG_011979.1                      | NM_004473.3                    | 1122       | 1               | A transcription factor functions in thyroid development                                                                            |
|                                   | Thyroid dysgenesis<br><i>NKX2-5</i> | NK2 transcription factor related, locus 5             | NG_013340.1                      | NM_004387.3                    | 975        | 2               | A transcription factor functions in heart formation and development                                                                |
|                                   | <i>TSHR</i>                         | Thyroid stimulating hormone receptor                  | NG_009206.1                      | NM_000369.2                    | 2295       | 10              | A receptor for thyrothropin and thyrostimulin, a major controller of thyroid cell metabolism                                       |
|                                   | <i>NKX2-1 (TTF-1)</i>               | NK2 homeobox 1                                        | NG_013365.1                      | NM_001079668.2                 | 1206       | 3               | A thyroid-specific transcription factor, regulates the expression of thyroid-specific genes and genes involved in morphogenesis    |
|                                   | <i>DUOX2 (THOX2)</i>                | Dual oxidase 2                                        | NG_009447.1                      | NM_014080.4                    | 4647       | 34              | H <sub>2</sub> O <sub>2</sub> generation in the follicle                                                                           |
|                                   | <i>DUOXA2</i>                       | Dual oxidase maturation factor 2                      | NG_016992.1                      | NM_207581.3                    | 963        | 6               | Necessary for proper cellular localization and maturation of functional dual oxidase 2.                                            |
|                                   | Dysormonogenesis<br><i>TPO</i>      | Thyroid peroxidase                                    | NG_011581.1                      | NM_000547.5                    | 2802       | 17              | Catalyses the oxidation, organification, and coupling reactions                                                                    |
|                                   | <i>SLC26A4 (PDS)</i>                | Solute carrier family 26, member 4 (Pendred syndrome, | NG_008489.1                      | NM_000441.1                    | 2343       | 21              | Transports iodine across apical membrane                                                                                           |

PDS

|                                           |                                                                                                    |                     |                                                                |                      |                    |      |    |                                                                                                                |
|-------------------------------------------|----------------------------------------------------------------------------------------------------|---------------------|----------------------------------------------------------------|----------------------|--------------------|------|----|----------------------------------------------------------------------------------------------------------------|
| Secondary<br>or Central<br>hypothyroidism | Isolated central<br>congenital<br>hypothyroidism(isolated TSH<br>deficiency)                       | <i>TG</i>           | Thyroglobulin                                                  | NG_015832<br>.1      | NM_003235.<br>4    | 8307 | 48 | Supports for thyroid hormone synthesis                                                                         |
|                                           |                                                                                                    | <i>SLC5A5(NIS)</i>  | Solute carrier family 5 (sodium iodide symporter), member 5    | NG_012930<br>.1      | NM_000453.<br>2    | 1932 | 15 | Transports iodine across basal membrane                                                                        |
|                                           |                                                                                                    | <i>IYD (DEHAL1)</i> | Iodotyrosine deiodinase                                        | :<br>NG_016007<br>.1 | NM_203395.<br>2    | 870  | 5  | Nitroreductase-related enzyme capable of deiodinating iodotyrosines                                            |
|                                           |                                                                                                    | <i>SECISBP2</i>     | SECIS binding protein 2                                        | NG_012177<br>.1      | NM_024077.<br>3    | 2565 | 17 | Essential bound protein mediating the correct binding of selenium with thyroxine deiodinated enzyme            |
|                                           |                                                                                                    | <i>TSHB</i>         | (Aliases: TSH-B, TSH-BETA)<br>Thyroid stimulating hormone beta | NG_015891<br>.1      | NM_000549.<br>3    | 417  | 3  | The beta subunit of thyroid stimulating hormone, functions in the control of thyroid structure and metabolism  |
|                                           |                                                                                                    | <i>IGSF1</i>        | Immunoglobulin superfamily, member 1                           | NG_021190<br>.1      | NM_0011709<br>61.1 | 4026 | 20 | May be involved in the expression of normal TRHR expression, causative gene of X-linked central hypothyroidism |
|                                           |                                                                                                    | <i>TRHR</i>         | Thyrotropin-releasing hormone receptor                         | NG_017161<br>.1      | NM_003301.<br>5    | 1197 | 2  | AG protein-coupled receptor for thyrotropin-releasing hormone                                                  |
|                                           | Combined<br>pituitary hormone<br>deficiencies(Deficiency in pituitary<br>transcription<br>factors) | <i>HESX1</i>        | Homeobox gene expressed in ES cells                            | NG_008242<br>.1      | NM_003865.<br>2    | 558  | 4  | A transcriptional repressor in the developing forebrain and pituitary gland                                    |
|                                           |                                                                                                    | <i>LHX3</i>         | LIM homeobox protein 3                                         | NG_008097<br>.1      | NM_014564.<br>3    | 1209 | 6  | A transcription factor that is required for pituitary development and motor neuron specification               |
|                                           |                                                                                                    | <i>LHX4</i>         | LIM homeobox protein 4                                         | NG_008081<br>.1      | NM_033343.<br>3    | 1173 | 6  | A transcription factor involved in the control of differentiation and                                          |

|                           |                                           |                                   |                                                                                            |             |             |      |    |                                                                                                                                                                            |
|---------------------------|-------------------------------------------|-----------------------------------|--------------------------------------------------------------------------------------------|-------------|-------------|------|----|----------------------------------------------------------------------------------------------------------------------------------------------------------------------------|
|                           |                                           |                                   |                                                                                            |             |             |      |    | development of the pituitary gland                                                                                                                                         |
|                           |                                           | <i>POU1F1</i><br>( <i>PIT1</i> )  | POU domain, class 1, transcription factor 1                                                | NG_008225.2 | NM_000306.2 | 876  | 6  | Regulates the expression of several genes involved in pituitary development and hormone expression.                                                                        |
|                           |                                           | <i>PROPI</i>                      | Prophet of Pit1, paired-like homeodomain transcription factor                              | NG_015889.1 | NM_006261.4 | 681  | 3  | A transcription factor responsible for pituitary development and hormone expression                                                                                        |
|                           |                                           | <i>SOX3</i>                       | SRY (sex determining region Y)-box 3                                                       | NG_009387.1 | NM_005634.2 | 1341 | 1  | A transcription factor involved in the regulation of embryonic development and in the determination of the cell fate.                                                      |
|                           | thyroid hormone resistance                | <i>THRB</i>                       | Thyroid hormone receptor, beta                                                             | NG_009159.1 | NM_000461.4 | 1387 | 10 | A nuclear hormone receptor for triiodothyronine, mediating the biological activities of thyroid hormone.                                                                   |
| Peripheral hypothyroidism |                                           | <i>THRA</i>                       | Thyroid hormone receptor, alpha                                                            | NG_023345.1 | NM_199334.3 | 1473 | 9  | A nuclear hormone receptor for triiodothyronine, mediating the biological activities of thyroid hormone.                                                                   |
|                           | thyroid hormone translocation abnormality | <i>SLC16A2</i><br>( <i>MCT8</i> ) | Solute carrier family 16 (monocarboxylic acid transporters), member 2 (putative transport) | NG_011641.1 | NM_006517.4 | 1620 | 6  | Mediating the uptake of thyroid hormones into the brain                                                                                                                    |
| Syndromic hypothyroidism  | Pendred syndrome                          | <i>SLC26A4</i><br>( <i>PDS</i> )  | Solute carrier family 26, member 4 (Pendred syndrome, PDS)                                 | NG_008489.1 | NM_000441.1 | 2343 | 21 | Functions as both a repressor and activator of transcription and is specifically involved in the development of pancreatic beta cells, the thyroid, eye, liver and kidney. |

|                                        |                                               |                       |                                                    |                 |                     |      |    |                                                                                                                                                                            |
|----------------------------------------|-----------------------------------------------|-----------------------|----------------------------------------------------|-----------------|---------------------|------|----|----------------------------------------------------------------------------------------------------------------------------------------------------------------------------|
| Transient congenital<br>hypothyroidism |                                               | <i>FOXI1</i>          | Forkhead box i1                                    | NG_012068<br>.1 | NM_012188.<br>4     | 1137 | 2  | May play an important role in the development of the cochlea and vestibulum, as well as in embryogenesis.                                                                  |
|                                        | Neonatal diabetes & congenital hypothyroidism | <i>GLIS3(ZNF515)</i>  | Glis family zinc finger 3                          | NG_011782<br>.1 | NM_152629.<br>3     | 2328 | 10 | Functions as both a repressor and activator of transcription and is specifically involved in the development of pancreatic beta cells, the thyroid, eye, liver and kidney. |
|                                        | Bamforth-Lazarus syndrome                     | <i>FOXE1 (TTF-2)</i>  | Thyroid transcription factor 2                     | NG_011979<br>.1 | NM_004473.<br>3     | 374  | 1  | A transcription factor functions in thyroid development                                                                                                                    |
|                                        | Choreoathetosis                               | <i>NKX2-1 (TTF-1)</i> | NK2 homeobox 1                                     | NG_013365<br>.1 | :NM_001079<br>668.2 | 402  | 3  | A thyroid-specific transcription factor, regulates the expression of thyroid-specific genes and genes involved in morphogenesis                                            |
|                                        | Johanson–Blizzard syndrome                    | <i>UBR1</i>           | Ubiquitin protein ligase E3 component n-recognin 1 | NG_012182<br>.1 | NM_174916           | 1750 | 47 | Responsible for facilitating the direct ubiquitination of substrate proteins                                                                                               |
|                                        |                                               | <i>ZNF252P</i>        | Zinc finger protein 252, pseudogene                | NG_12047.<br>2  | NM_000465.<br>2     | 5210 | 5  | A candidate gene for a patient's transient neonatal thyroid dysfunction                                                                                                    |
|                                        |                                               | <i>DUOXA2</i>         | Dual oxidase maturation factor 2                   | NG_016992<br>.1 | NM_207581.<br>3     | 321  | 6  | Necessary for proper cellular localization and maturation of functional dual oxidase 2.                                                                                    |

RefSeq, reference sequence; CDS, coding DNA sequence.
